# Supplementary material
Source: Springer Nature journal article supplement (https://www.springermedizin.de/resource/supplementary/13054_2012_941_MOESM8_ESM.pdf/9709290)

A

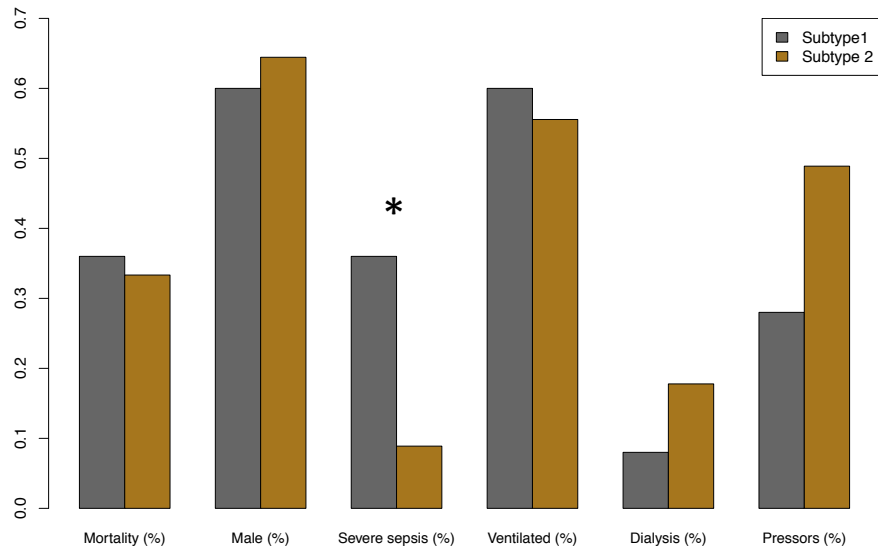

B

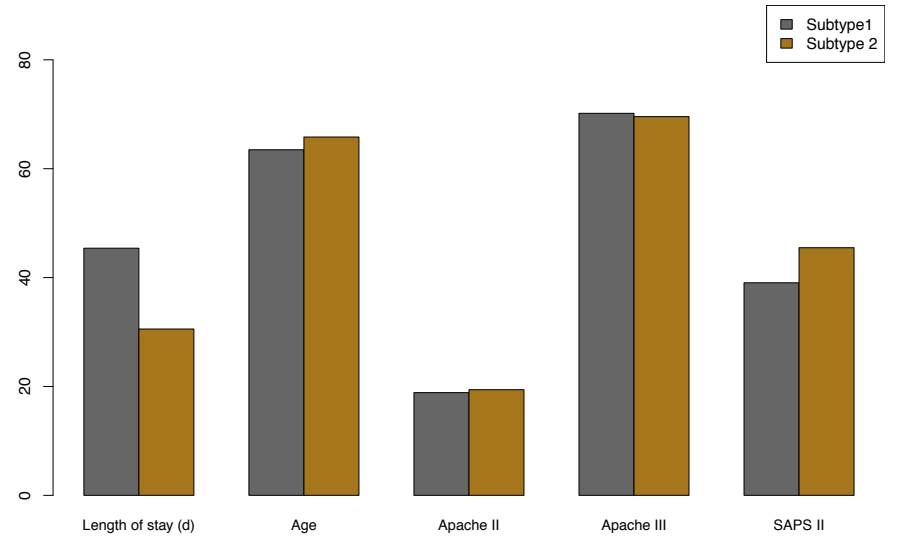

Supplement: MOESM8 [file 9709290]
